# Supplementary material for: Solution-processed highly bright and durable cesium lead halide perovskite light-emitting diodes
Source: Royal Society of Chemistry journal article supplement (doi:10.1039/c6nr05330k), 2016-01-01
Supplement: c6nr05330k1.pdf [file c6nr05330k1.pdf]

# Solution-processed Highly Bright and Durable Cesium Lead Halide Perovskite Light-emitting Diodes

*Zhanhua We,<sup>a,c,\*</sup> Ajay Perumal,<sup>b</sup> Rui Su,<sup>a</sup> Shendre Sushant,<sup>b</sup> Jun Xing,<sup>a</sup> Qing Zhang,<sup>a</sup> Swee Tiam Tan,<sup>b</sup> Hilmi Volkan Demir,<sup>b,\*</sup> and Qihua Xiong<sup>a,\*</sup>*

<sup>a</sup>Division of Physics and Applied Physics, School of Physical and Mathematical Sciences, Nanyang Technological University, Singapore 637371. Email: qihua@ntu.edu.sg

<sup>b</sup>Luminous! Centre of Excellence for Semiconductor Lighting and Displays, School of Electrical and Electronic Engineering, Nanyang Technological University, Singapore 639798. Email: hvdemir@ntu.edu.sg

<sup>c</sup>College of Materials Science & Engineering, Huaqiao University, Xiamen, Fujian, China 361021. Email: weizhanhua@hqu.edu.cn

† Z.H. Wei and A. Perumal contribute equally to this work.

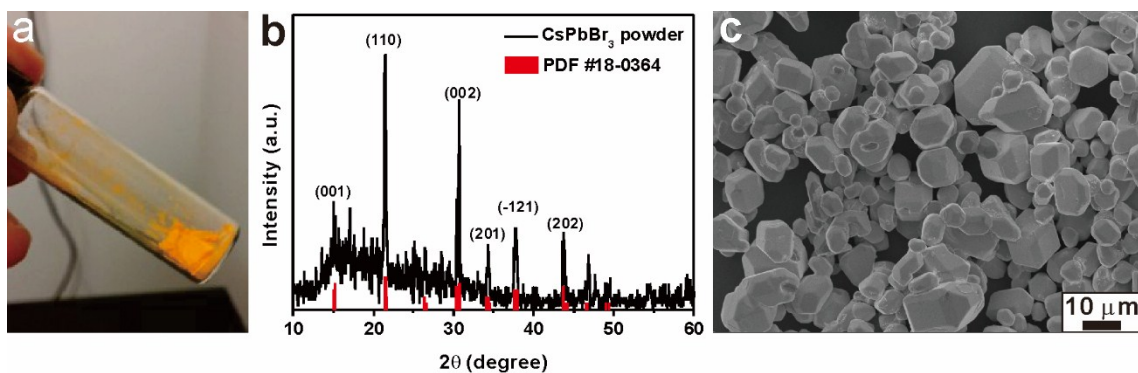

**Figure S1.** (a) Photograph, (b) XRD pattern and (c) SEM image of the as-prepared CsPbBr<sub>3</sub> powder.

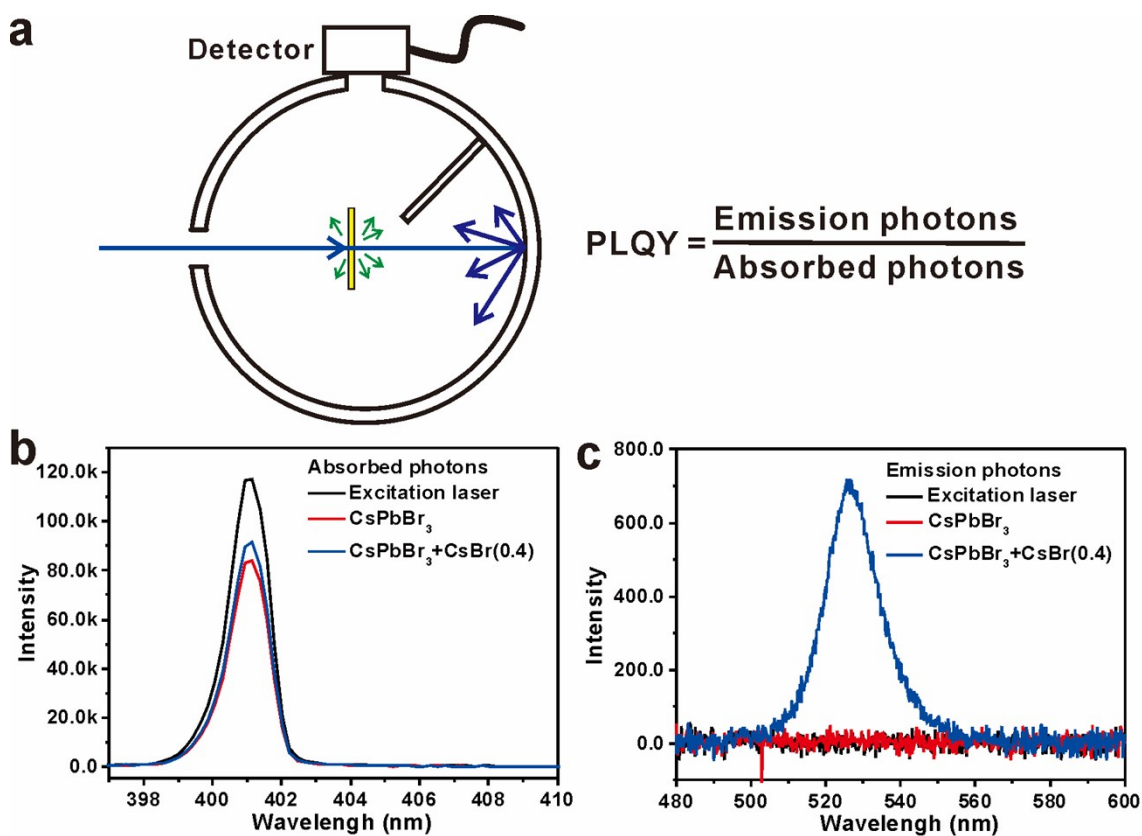

**Figure S2.** PLQY measurement of the as-deposited perovskite films. (a) Schematic diagram of the home-made apparatus for PLQY measurement. (b) Intensity spectra of the pristine excitation laser and lasers passing through CsPbBr<sub>3</sub> and CsPbBr<sub>3</sub>+CsBr(0.4) thin films, where the absorbed photons number can be calculated by integrating area between curves. (c) Emission

spectra of the pristine excitation laser and CsPbBr<sub>3</sub> and CsPbBr<sub>3</sub>+CsBr(0.4) thin films, where the emission photons number can be calculated by integrating area between curves. After calculation, it is determined that the PLQY of CsPbBr<sub>3</sub> and CsPbBr<sub>3</sub>+CsBr(0.4) thin films are 0.5 % and 33.6 %, respectively.

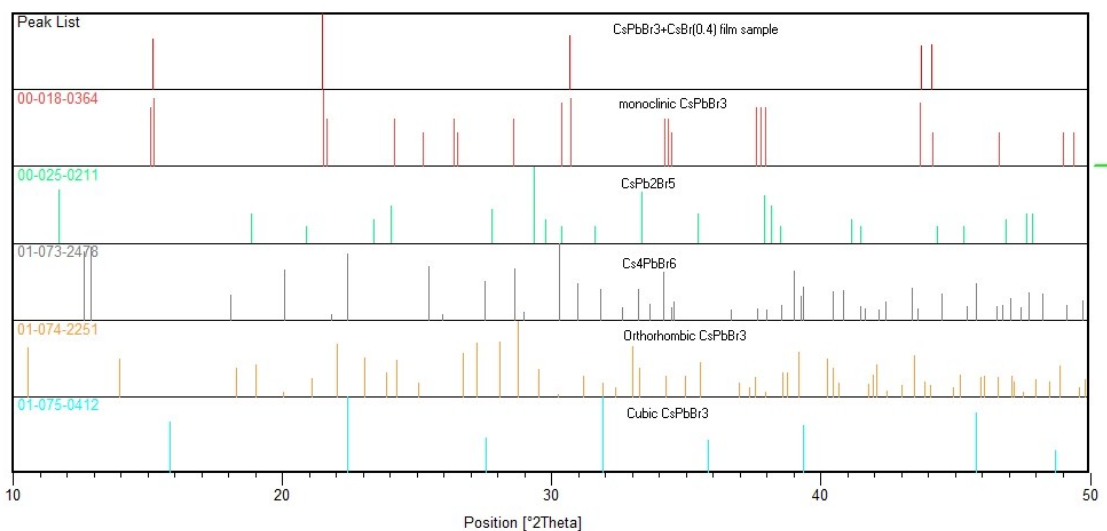

**Figure S3.** XRD analysis of the as-prepared CsPbBr<sub>3</sub>+CsBr(0.4) films, from which we can conclude that the film is pure monoclinic phase by carefully comparing XRD data with other related standard diffraction patterns.

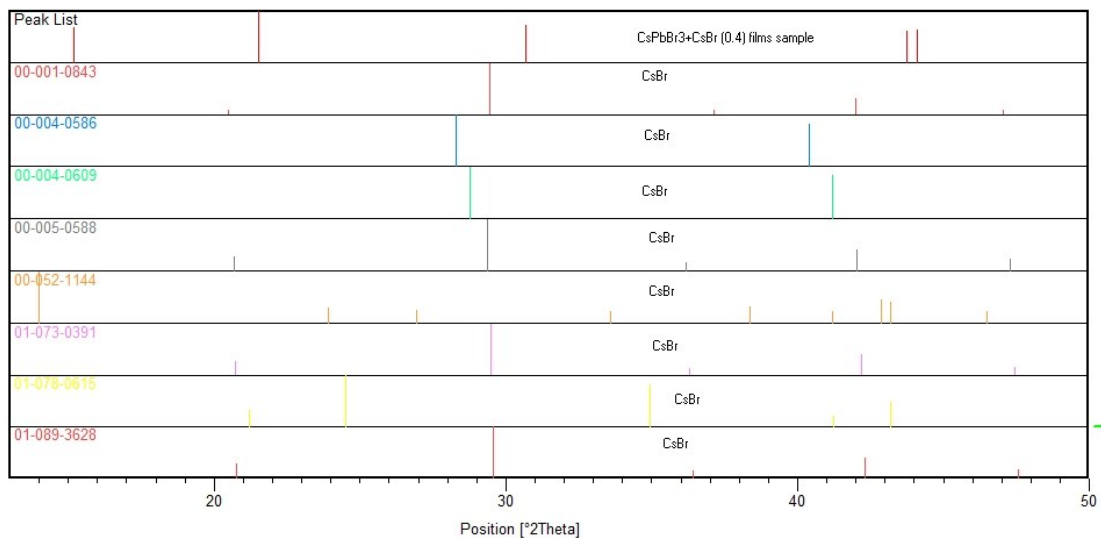

**Figure S4.** XRD analysis of the as-prepared  $\text{CsPbBr}_3+\text{CsBr}(0.4)$  films, from which we can conclude that there is not CsBr residues in the as-formed films by comparing the XRD data with all of the other standard diffraction patterns of CsBr.

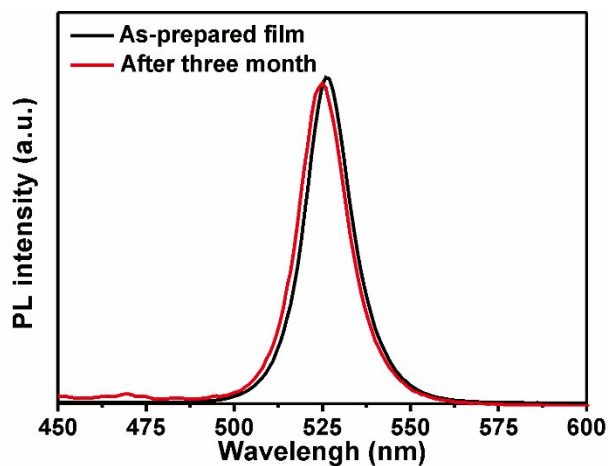

**Figure S5.** Outstanding PL stability of one as-deposited  $\text{CsPbBr}_3+\text{CsBr}(0.4)$  thin film, after 3 month of storage in ambient air ( $\sim 50\%$  humidity), the PL spectra remains nearly the same.

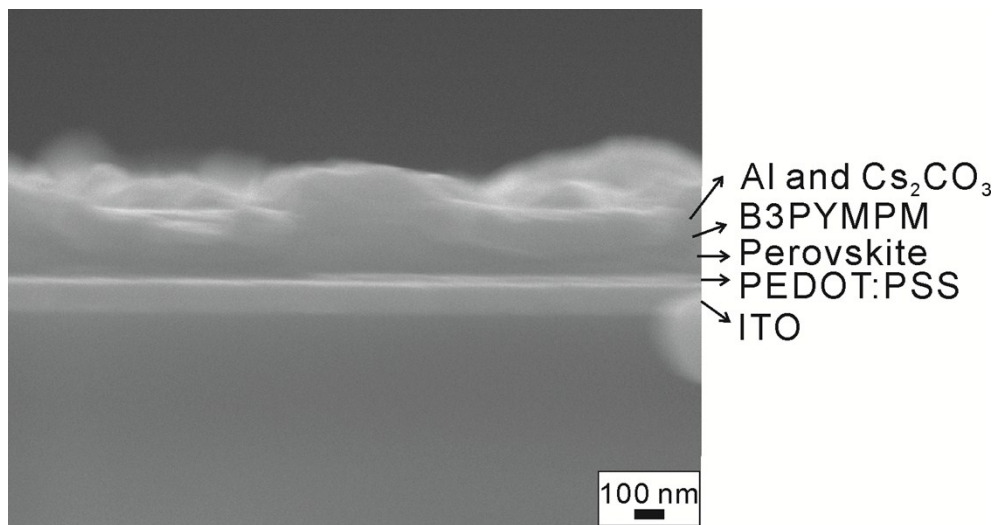

**Figure S6.** Cross-sectional SEM image of the LED device, showing a layer by layer structure: ITO\PEDOT:PSS\perovskite\B3PYMPM\Cs<sub>2</sub>CO<sub>3</sub>+Al.

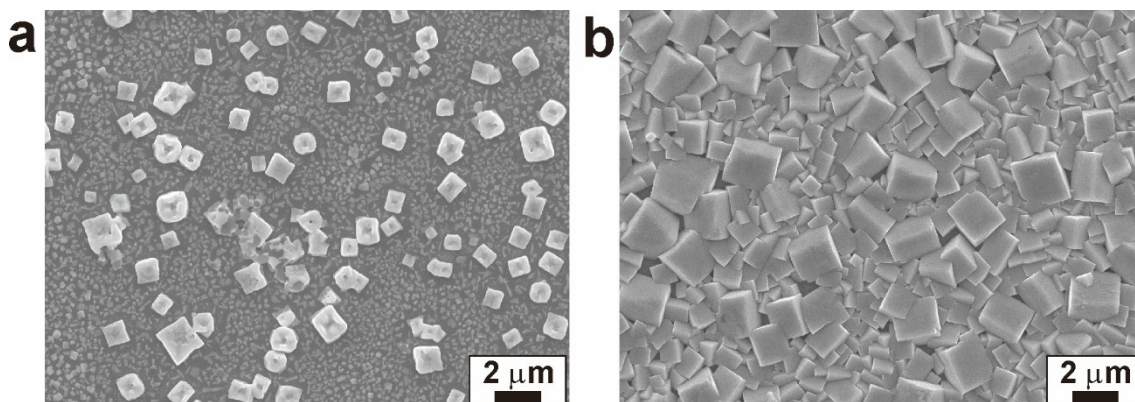

**Figure S7.** (a) and (b) Top-view SEM images of the as-deposited CsPbBr<sub>3</sub> and CsPbBr<sub>3</sub>+CsBr(0.4) films on PEDOT:PSS.

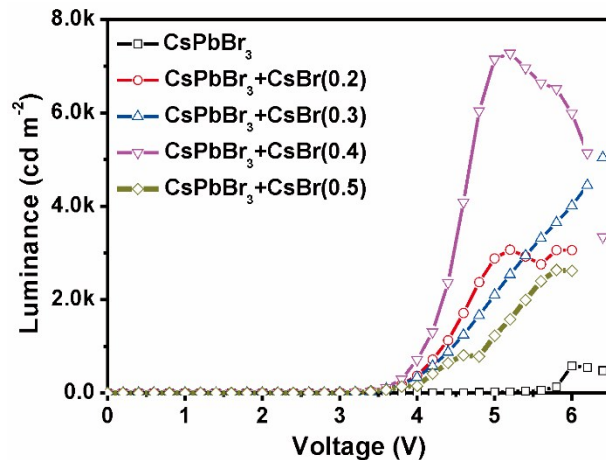

**Figure S8.** Luminance versus driving voltage ( $L$ - $V$ ) curves for perovskite films fabricated with different precursor solution.

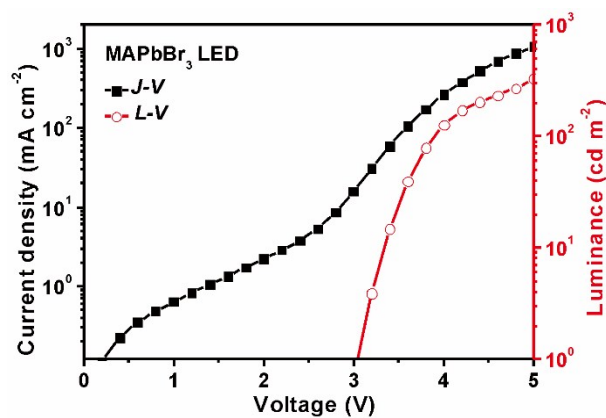

**Figure S9.** Luminance-current density-voltage ( $L$ - $J$ - $V$ ) curve of a MAPbBr<sub>3</sub> LED device.

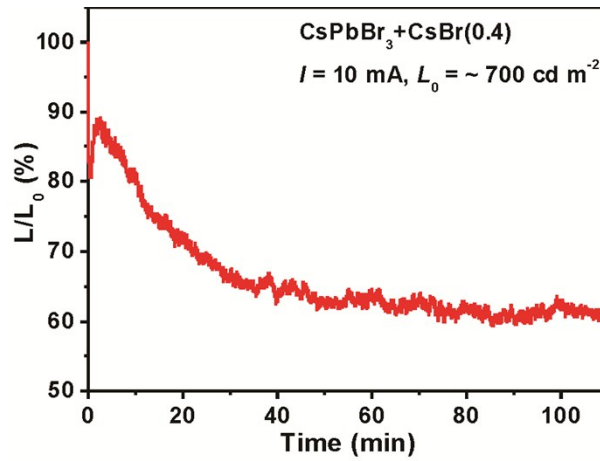

**Figure S10.** Ambient stability of a CsPbBr<sub>3</sub>+CsBr(0.4) LED device under a constant driving current of 10 mA ( $J = 333.33 \text{ mA cm}^{-2}$ ), where we can see the device cannot stand at such high current density. Specifically, the device performance drops dramatically to  $\sim 80\%$  of  $L_0$  at the very first few seconds and decreases slightly to  $\sim 60\%$  with some fluctuation in 100 min.
